# Supplementary material
Source: PubMed Central journal article supplement (PMC2889317)
Supplement: 0912949107_pnas.0912949107_SI.pdf [file 0912949107_pnas.0912949107_SI.pdf]

# Supporting Information

Welander et al. 10.1073/pnas.0912949107

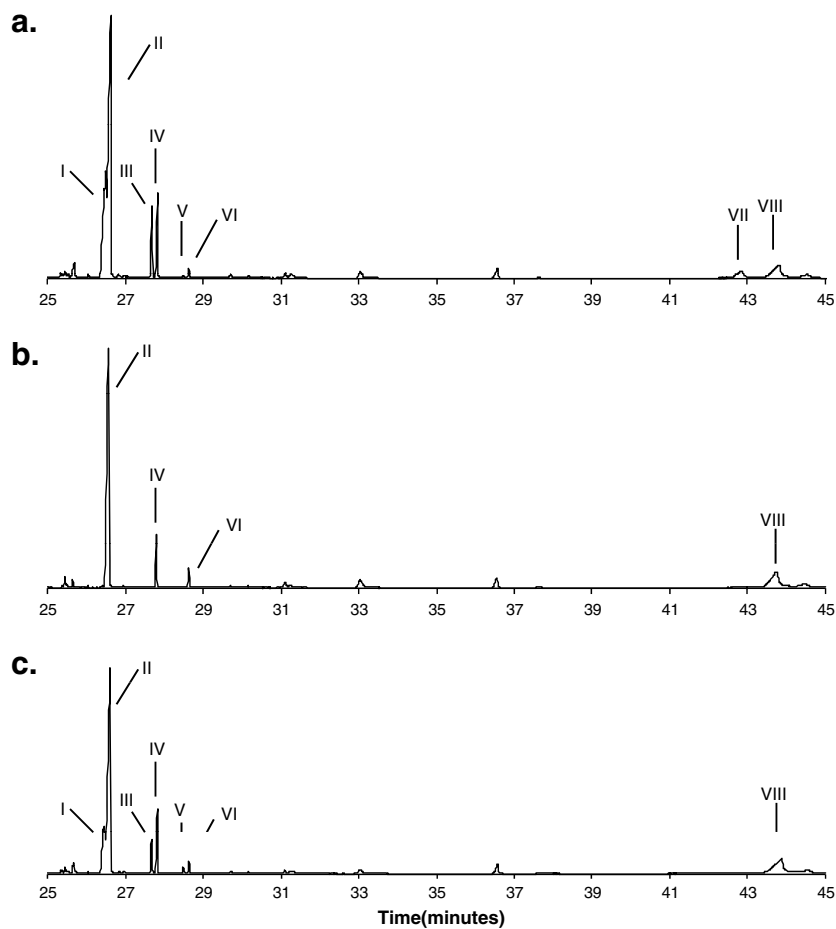

**Fig. S1.** Chromatograms of total lipid extract separated by GC-MS from the following strains: *a*, *Rhodospseudomonas palustris* TIE-1. *b*, *R. palustris*  $\Delta$ hpnP. *c*, *R. palustris*  $\Delta$ hpnP complemented with the  $\Delta$ hpnP gene on a self-replicating plasmid. Numbered compounds: I, 2-methylhopenes; II, hopenes; III, 2-methyldi-*p*lopterol; IV, diplopterol; V, 2-methyltetrahymanol; VI, tetrahymanol; VII, 2-methylbacteriohopanetetrol; and VIII, bacteriohopanetetrol.

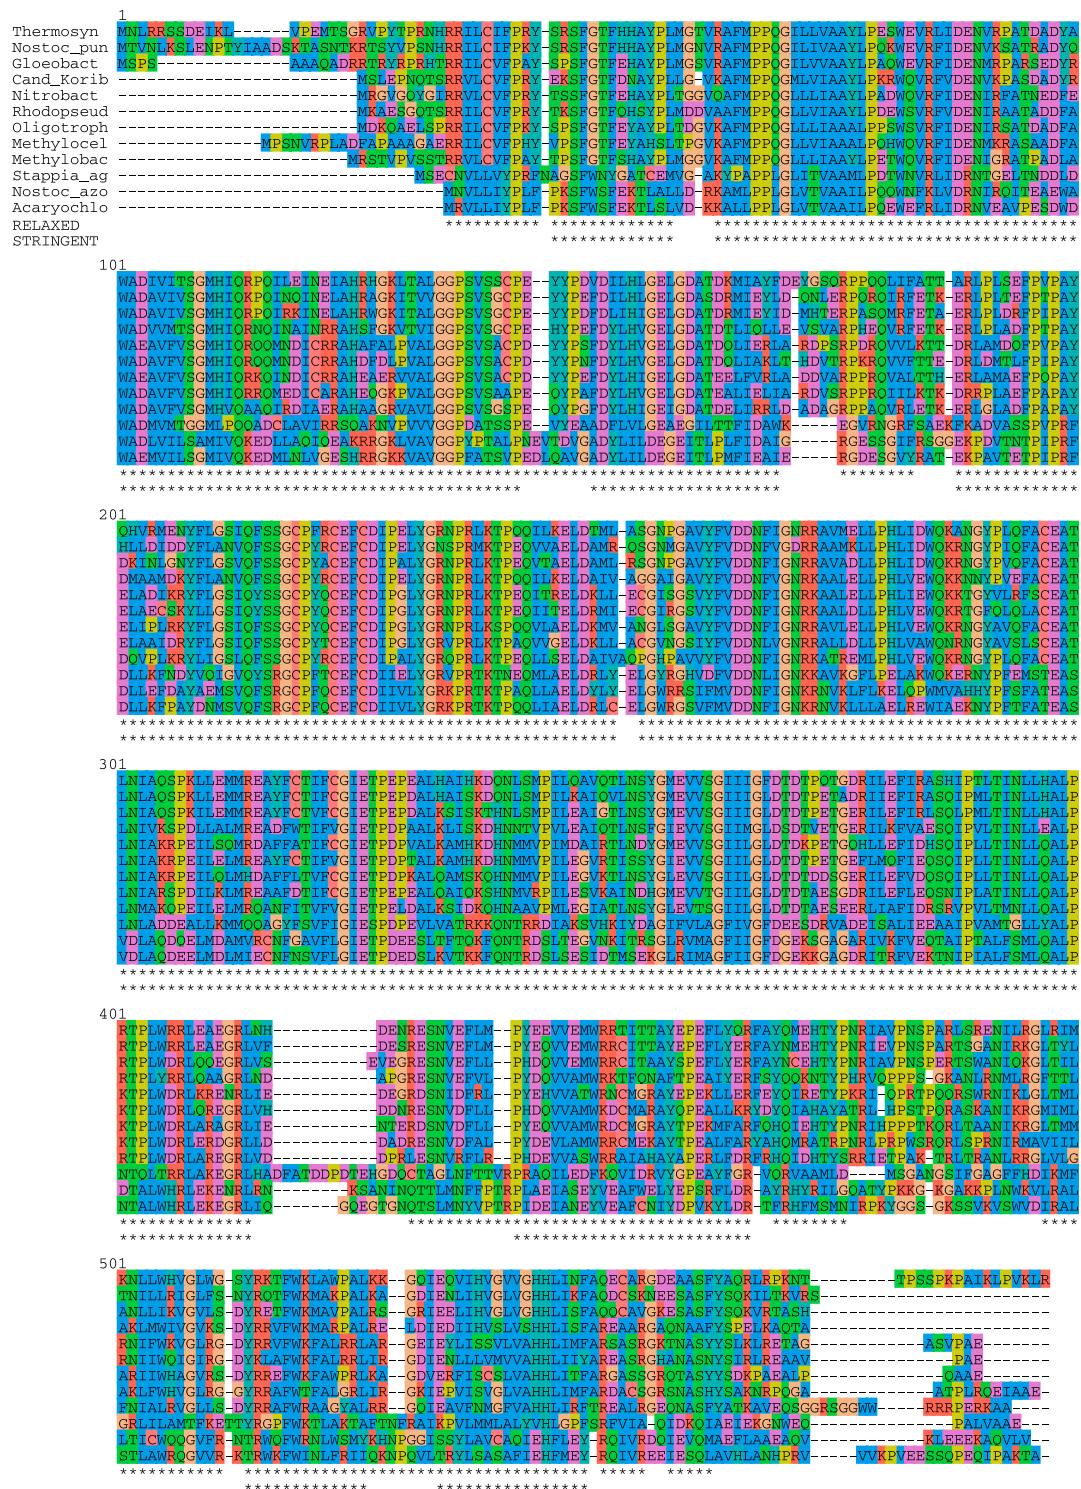

**Fig. S2.** Alignment of select HpnP and outgroup sequences showing filtered and unfiltered positions. The twelve representatives are as follows: *Thermosynococcus elongatus*, *Nostoc punctiforme* PCC73102, *Gloeobacter violaceus* PCC7421, *Candidatus Koribacter versatilis* Ellin 345, *Nitrobacter sp.* Nb-311a, *R. palustris* TIE-1, *Oligotropha carboxidovorans* OM5, *Methylocella silvestris* BL2, *Methylobacterium nodulans* ORS2060, *Stappia aggregata* IAM12614 (outgroup), *Nostoc azollae* 0708 (outgroup), and *Acaryochloris marina* MBIC11017 (outgroup). This alignment is from trials 7–9 (Table S3) and was generated by Muscle with one outgroup family. The sites included in the filtered alignments under relaxed and stringent scenarios are marked with \*.



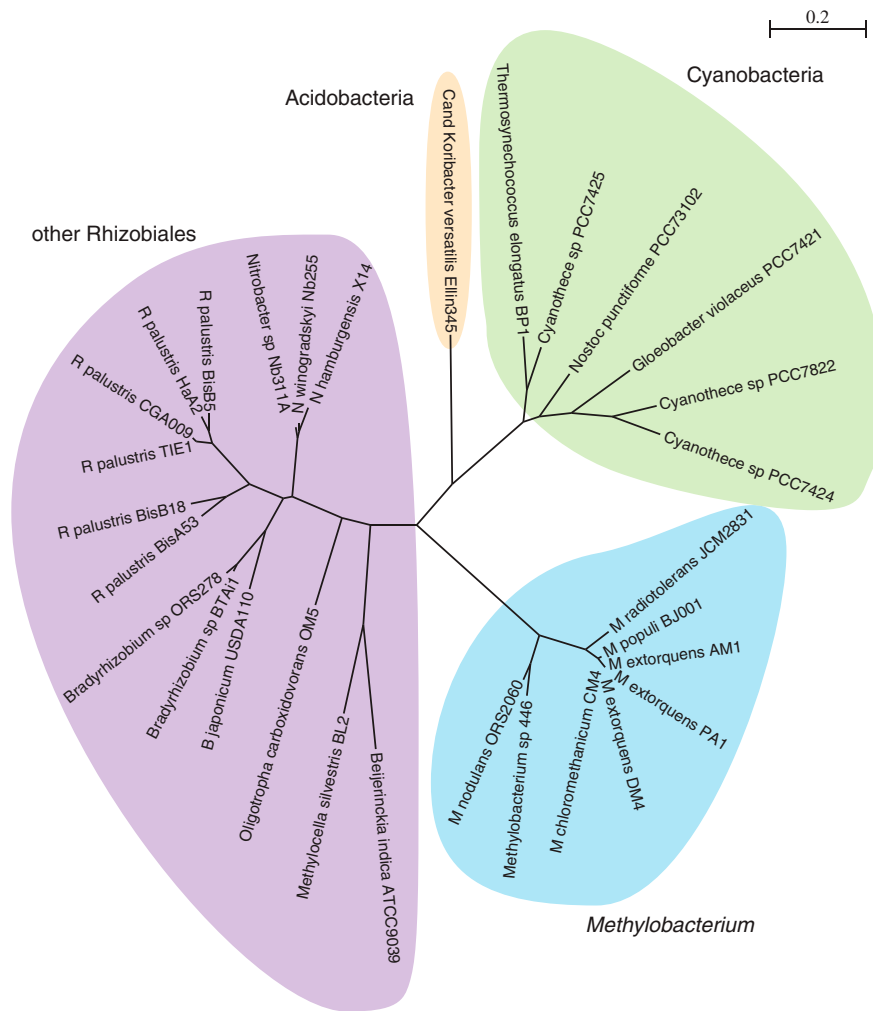

**Fig. S4.** Unrooted tree showing the major clusters of HpnP from different bacterial phyla. The alignment was generated by Muscle and maximum likelihood tree inferred using PhyML as described in *Methods*.

**Table S1. Presence of 2-methylhopanoids in bacteria with an HpnP homolog**

| Bacterial genome                                            | 2-Me C30*       | 2-Me C35 <sup>†</sup> | Ref.       | Isolation habitat     |
|-------------------------------------------------------------|-----------------|-----------------------|------------|-----------------------|
| <i>α</i> -Proteobacteria                                    |                 |                       |            |                       |
| <i>R. palustris</i> TIE-1                                   | +               | +                     | (1)        | Iron mat              |
| <i>R. palustris</i> CGA009                                  | +               | +                     | (1)        | Freshwater sediment   |
| <i>R. palustris</i> BisB18                                  | +               | +                     | This study | Freshwater sediment   |
| <i>R. palustris</i> BisA53                                  | +               | +                     | This study | Freshwater sediment   |
| <i>R. palustris</i> BisB5                                   | +               | +                     | This study | Freshwater sediment   |
| <i>R. palustris</i> HaA2                                    | +               | +                     | This study | Freshwater sediment   |
| <i>Bradyrhizobium</i> sp. ORS278                            | nt <sup>‡</sup> | nt                    |            | Stem nodules          |
| <i>Bradyrhizobium</i> sp. BTAi1                             | +               | –                     | (2)        | Stem nodules          |
| <i>Bradyrhizobium japonicum</i> USDA110                     | +               | –                     | (2)        | Root nodules          |
| <i>Nitrobacter hamburgensis</i> X14                         | nt              | nt                    |            | Soil                  |
| <i>Nitrobacter winogradskyi</i> Nb-255                      | nt              | nt                    |            | Soil                  |
| <i>Nitrobacter</i> sp. Nb-311A                              | nt              | nt                    |            | Coastal marine waters |
| <i>O. carboxidovorans</i> OM5                               | nt              | nt                    |            | Wastewater            |
| <i>Beijerinckia indica</i> ATCC 9039                        | +               | –                     | (3)        | Acidic soil           |
| <i>M. silvestris</i> BL2                                    | nt              | nt                    |            | Acidic forest soil    |
| <i>Methylobacterium extorquens</i> AM1 <sup>§</sup>         | nt              | nt                    |            | Airborne contaminant  |
| <i>M. extorquens</i> PA1 <sup>§</sup>                       | nt              | nt                    |            |                       |
| <i>M. extorquens</i> DM4 <sup>§</sup>                       | nt              | nt                    |            | Industrial wastewater |
| <i>Methylobacterium chloromethanicum</i> CM4 <sup>§</sup>   | nt              | nt                    |            | Contaminated soil     |
| <i>M. nodulans</i> ORS 2060 <sup>§</sup>                    | nt              | nt                    |            | Root nodules          |
| <i>Methylobacterium populi</i> BJ001 <sup>§</sup>           | nt              | nt                    |            | Poplar tree           |
| <i>Methylobacterium</i> sp. 4–46 <sup>§</sup>               | nt              | nt                    |            | Root nodules          |
| <i>Methylobacterium radiotolerans</i> JCM 2831 <sup>§</sup> | nt              | nt                    |            |                       |
| Cyanobacteria                                               |                 |                       |            |                       |
| <i>G. violaceus</i> PCC 7421                                | +               | +                     | (4)        | Calcareous rocks      |
| <i>T. elongatus</i> BP-1                                    | nt              | nt                    |            | Hot spring            |
| <i>Cyanothece</i> sp. 7424 <sup>§</sup>                     | nt              | nt                    |            | Rice field            |
| <i>Cyanothece</i> sp. 7425 <sup>§</sup>                     | nt              | nt                    |            | Rice field            |
| <i>Cyanothece</i> sp. PCC7822 <sup>§</sup>                  | nt              | nt                    |            | Rice field            |
| <i>Nostoc punctiforme</i> PCC73102                          | +               | +                     | (4)        | Gymnosperm symbiont   |
| Acidobacteria                                               |                 |                       |            |                       |
| <i>Candidatus Koribacter versatilis</i> Ellin345            | nt              | nt                    |            | Soil                  |

\*2-MeC30 indicates 2-methylhopenes.

<sup>†</sup>2-MeC35 indicates 2-methylbacteriohopanetetrol.

<sup>‡</sup>Indicates not tested.

<sup>§</sup>2-methylhopanoid production has been shown in other *Methylobacterium* and *Cyanothece* strains (4, 5).

- Rashby SE, et al. (2007) Biosynthesis of 2-methylbacteriohopanepolyols by an anoxygenic phototroph. *Proc Natl Acad Sci USA* 104:15099–15104.
- Bravo JM, et al. (2001) Novel methylated triterpenoids of the gammacerane series from the nitrogen-fixing bacterium *Bradyrhizobium japonicum*. *Eur J Biochem* 268:1323–1331.
- Vilcheze C, et al. (1994) Prokaryotic triterpenoids: new hopanoids from the nitrogen-fixing bacteria *Azotobacter vinelandii*, *Beijerinckia indica* and *Beijerinckia mobilis*. *Microbiology* 140:2749–2753.
- Talbot HM, et al. (2008) Cyanobacterial bacteriohopanepolyol signatures from cultures and natural environmental settings. *Org Geochem* 39:232–263.
- Knani M, Corpe WA, Rohmer M (1994) Bacterial hopanoids from pink pigmented facultative methylotrophs (PPFMs) and from green plant surfaces. *Microbiology* 140:2755–2759.



**Table S3. Sensitivity of rooted HpnP topology to alignment parameters**

| Trial | Total taxa incl. outgroup(s) | Alignment program | Filtering by Gblocks | No. of sites | -lnL      | Best topology* |
|-------|------------------------------|-------------------|----------------------|--------------|-----------|----------------|
| 1     | 83                           | ClustalW          | None                 | 622          | 35,976.33 | C              |
| 2     | 83                           | ClustalW          | Stringent            | 399          | 21,615.26 | C              |
| 3     | 83                           | ClustalW          | Relaxed              | 469          | 27,187.91 | A              |
| 4     | 118                          | ClustalW          | None                 | 678          | 57,342.19 | A              |
| 5     | 118                          | ClustalW          | Stringent            | 280          | 22,884.90 | A              |
| 6     | 118                          | ClustalW          | Relaxed              | 422          | 38,833.93 | A              |
| 7     | 83                           | Muscle            | None                 | 626          | 36,221.90 | A              |
| 8     | 83                           | Muscle            | Stringent            | 392          | 20,958.59 | A              |
| 9     | 83                           | Muscle            | Relaxed              | 468          | 26,874.87 | B              |
| 10    | 118                          | Muscle            | None                 | 704          | 58,004.70 | B              |
| 11    | 118                          | Muscle            | Stringent            | 306          | 25,363.81 | A              |
| 12    | 118                          | Muscle            | Relaxed              | 411          | 36,969.22 | A              |
| 13    | 83                           | T-Coffee          | None                 | 689          | 35,924.79 | A              |
| 14    | 83                           | T-Coffee          | Stringent            | 382          | 20,832.01 | A              |
| 15    | 83                           | T-Coffee          | Relaxed              | 452          | 25,723.67 | A              |
| 16    | 118                          | T-Coffee          | None                 | 812          | 57,199.16 | B              |
| 17    | 118                          | T-Coffee          | Stringent            | 312          | 25,942.82 | A              |
| 18    | 118                          | T-Coffee          | Relaxed              | 394          | 34,708.95 | A              |

\*A indicates a topology similar to Fig. 4A, with early branching cyanobacteria. B, topology similar to Fig. 4B, with monophyletic cyanobacteria sister to the  $\alpha$ -proteobacteria. C, topology similar to Fig. 4C, with cyanobacteria branching within the  $\alpha$ -proteobacteria. We did not consider the position of the lone acidobacterium sequence as it was not well-supported in most trials.

**Table S4. Comparing alternative tree topologies using Shimodaira's Approximately Unbiased test**

| Alignment            | No. of sites | -lnL for topology* |           |           | p-value for topology† |      |      |
|----------------------|--------------|--------------------|-----------|-----------|-----------------------|------|------|
|                      |              | A                  | B         | C         | A                     | B    | C    |
| ClustalWno filtering | 622          | 36,001.91          | 35,997.57 | 35,976.33 | 0.20                  | 0.26 | 0.81 |
| ClustalW relaxed     | 469          | 27,187.91          | 27,199.24 | 27,199.77 | 0.69                  | 0.32 | 0.38 |
| ClustalW stringent   | 399          | 21,621.43          | 21,634.54 | 21,615.26 | 0.46                  | 0.18 | 0.68 |
| Muscleno filtering   | 626          | 36,221.90          | 36,244.39 | 36,259.22 | 0.84                  | 0.24 | 0.10 |
| Musclerelaxed        | 468          | 26,884.17          | 26,874.87 | 26,899.22 | 0.41                  | 0.73 | 0.16 |
| Musclestringent      | 392          | 20,958.59          | 20,982.64 | 20,964.40 | 0.72                  | 0.14 | 0.42 |

\*For each alignment, the best tree was found by PhyML and its likelihood is shown in bold. The two alternative topologies were fixed for each alignment to topology A, B, or C from Fig. 4 and then branch lengths and substitution parameters were optimized on that topology, giving the likelihood values shown. These three trees were then compared using the AU test.

†p-values <0.05 allow us to reject that tree as the most likely. If no p-value is <0.05, then all three trees belong to the confidence set and the true tree could be any one of them.

**Table S5. Strains and plasmids used in this study**

| Strains or plasmids                        | Genotype, markers, or characteristics                                                                                                             |
|--------------------------------------------|---------------------------------------------------------------------------------------------------------------------------------------------------|
| <b>Strains</b>                             |                                                                                                                                                   |
| <i>E. coli</i> S17-1                       | <i>thi pro hdsR hdsM<sup>+</sup> recA</i> ; chromosomal insertion of RP4-2 (Tc::Mu Km::Tn7)                                                       |
| <i>R. palustris</i> TIE-1                  | Isolated from Woods Hole, MA                                                                                                                      |
| <i>R. palustris</i> $\Delta$ hpnP          | <i>R. palustris</i> TIE-1 $\Delta$ hpnP                                                                                                           |
| <i>R. palustris</i> $\Delta$ hpnP + pPVW24 | <i>R. palustris</i> TIE-1 $\Delta$ hpnP transformed to Gm <sup>r</sup> with pPVW24                                                                |
| <b>Plasmids</b>                            |                                                                                                                                                   |
| pJQ200SK                                   | Mobilizable suicide vector; <i>sacB</i> Gm <sup>r</sup>                                                                                           |
| pBBR1MCS-5                                 | 5.1-kb broad host range plasmid; Gm <sup>r</sup> <i>lacZ</i>                                                                                      |
| pPVW9                                      | 1-kb <i>hpnP</i> upstream region PCR amplified with primers PW39 and PW40 and cloned into pJQ200SK at <i>NotI</i> and <i>XbaI</i>                 |
| pPVW10                                     | 1-kb <i>hpnP</i> downstream region PCR amplified with primers PW41 and PW42 and cloned into pJQ200SK at <i>XbaI</i> and <i>SpeI</i>               |
| pPVW17                                     | <i>XbaI</i> and <i>SpeI</i> cut <i>hpnP</i> downstream fragment from pPVW10 subcloned into pPVW9                                                  |
| pPVW24                                     | 3.5-kb <i>hpnP</i> complementation fragment PCR amplified with primers PW85 and PW86 and cloned into pBBR1MCS-5 at <i>HindIII</i> and <i>SpeI</i> |
| Gm, gentamicin                             |                                                                                                                                                   |

**Table S6. Data for hopanoid analysis of *R. palustris* strains by high-temperature GC-MS**

| Analyte                      | Rt*   | M <sup>+</sup> (RI) | Base peak | Characteristic fragments (RI)             |
|------------------------------|-------|---------------------|-----------|-------------------------------------------|
| 2-methylhopene               | 26.45 | 424(18)             | 189       | 205(73), 355(23), 381(25)                 |
| hopene                       | 26.59 | 410(18)             | 189       | 191(93), 341(27), 367(23), 410(19)        |
| 2-methyldiplopterol acetate  | 27.68 | 484                 | 149       | 189(92), 205(80), 381(5), 424(4)          |
| diplopterol acetate          | 27.82 | 470                 | 191       | 149 (93), 189(95), 367(5), 410(4)         |
| 2-methyltetrahymanol acetate | 28.49 | 484                 | 205       | 189(32), 263(5), 355(4), 424(4)           |
| tetrahymanol acetate         | 28.64 | 470(6)              | 191       | 189(46), 249(6), 395(5), 410(4)           |
| 2-methylBHtetrol acetate     | 42.84 | 728(1)              | 205/95    | 253(10), 383(19), 433(5), 493(38), 713(1) |
| BHtetrol acetate             | 43.81 | 714(.5)             | 191       | 253(9), 369(18), 433(4), 493(34), 699(1)  |

\*Retention time (min) on 30 m DB-XLB column and using an Agilent 6890GC/5975MSD.
